# Supplementary material for: A nanocomposite of SnO2 and single-walled carbon nanohorns as a long life and high capacity anode material for lithium ion batteries
Source: Royal Society of Chemistry journal article supplement (doi:10.1039/c1ra00267h), 2011-01-01
Supplement: c1ra00267h.pdf [file c1ra00267h.pdf]

# A nanocomposite of SnO<sub>2</sub> and single-walled carbon nanohorns as a long life and high capacity anode material for lithium ion batteries

Yi Zhao, Jiaxin Li, Yunhai Ding, Lunhui Guan\*

State Key Laboratory of Structural Chemistry, Fujian Institute of Research on the Structure of Matter, Chinese Academy of Sciences, Yangqiao West Road 155#, Fuzhou, Fujian 350002, P.R. China.

E-mail: [guanlh@fjirsm.ac.cn](mailto:guanlh@fjirsm.ac.cn)

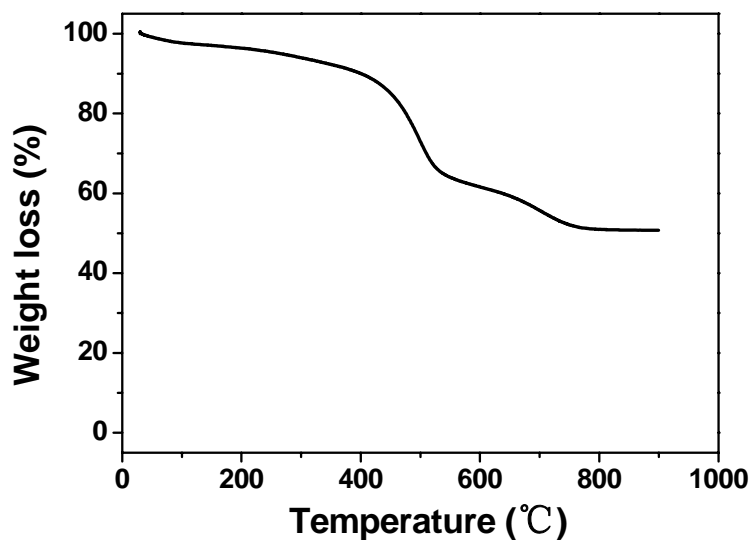

**Fig. S1.** Thermal gravimetric analysis (TGA) curve of the SnO<sub>2</sub>/SWCNHs composite obtained at a heating rate of 10 °C/min between 30 and 900 °C.

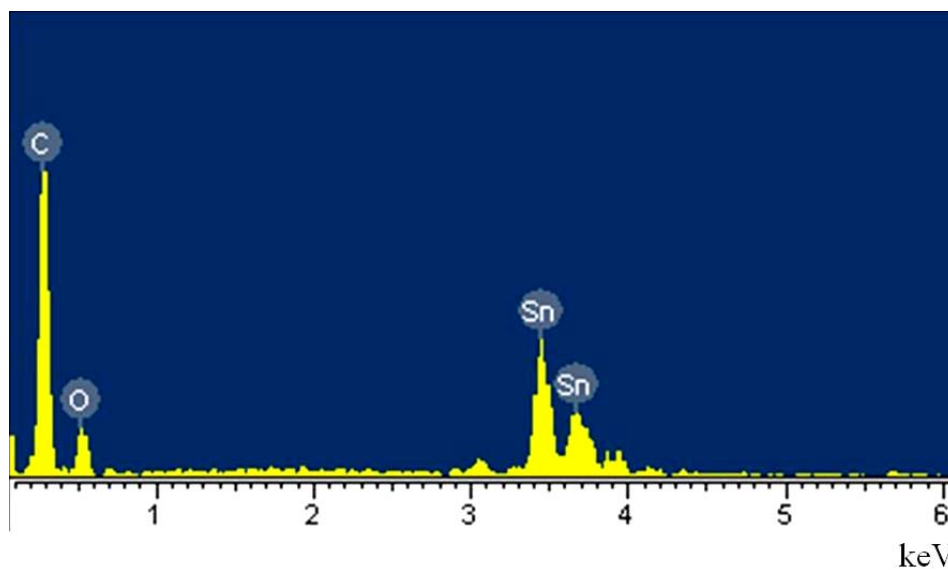

**Fig. S2.** The energy dispersive spectroscopy (EDS) spectrum of the SnO<sub>2</sub>/SWCNHs composite.

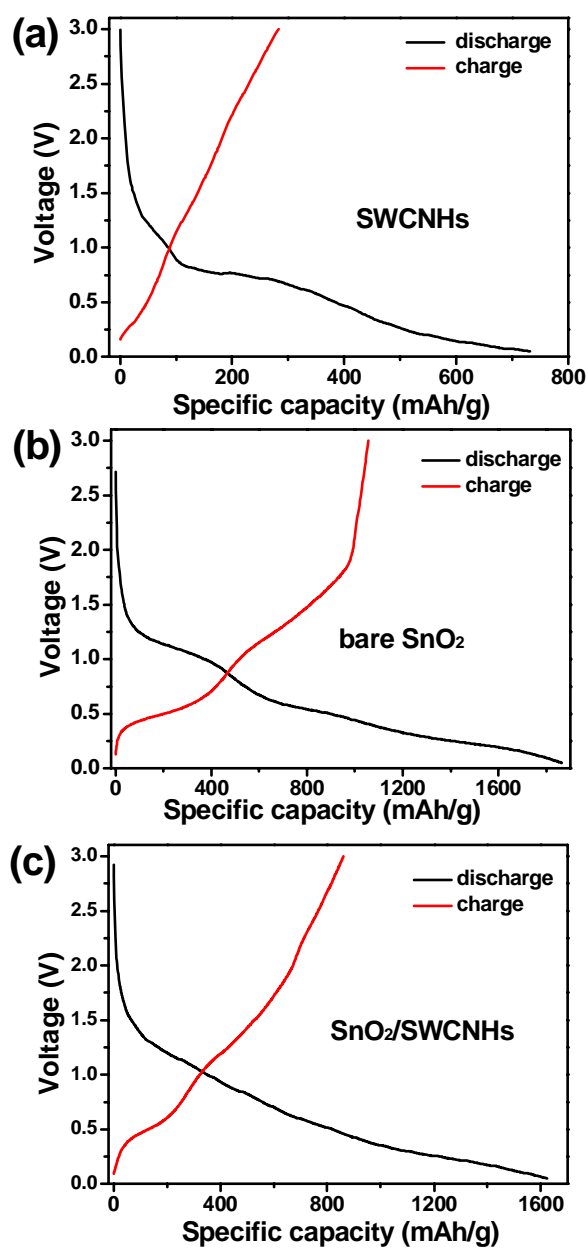

**Fig. S3.** The first discharge and charge curves of (a) SWCNHs, (b) bare SnO<sub>2</sub> and (c) SnO<sub>2</sub>/SWCNHs composite.

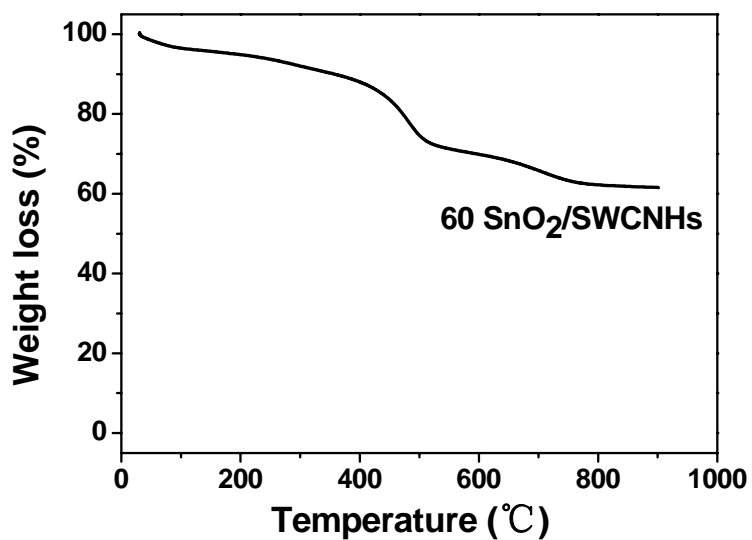

**Fig. S4.** Thermal gravimetric analysis (TGA) curve of the (60% SnO<sub>2</sub>)/SWCNHs composite obtained at a heating rate of 10 °C/min between 30 and 900 °C.

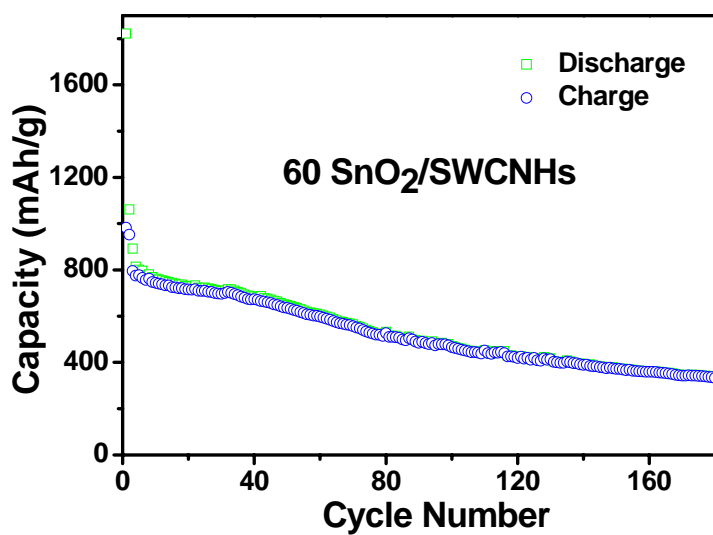

**Fig. S5.** Cycling performance of (60% SnO<sub>2</sub>)/SWCNHs electrode at a current density of 500 mA g<sup>-1</sup>.

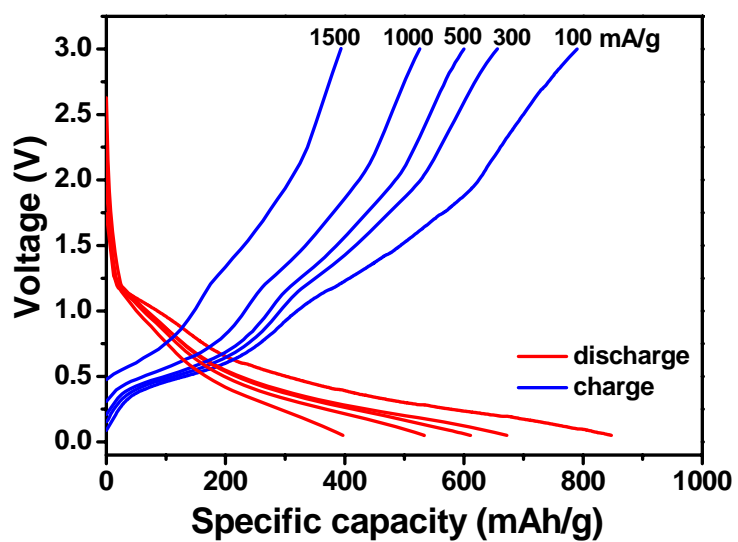

**Fig. S6.** Discharge and charge profiles of the SnO<sub>2</sub>/SWCNHs composite under various current densities from 100 to 1500 mA g<sup>-1</sup>.
